# Supplementary material for: Self-Reported Psychosomatic Complaints and Conduct Problems in Swedish Adolescents
Source: Children (Basel). 2022 Jun 27;9(7):963. doi: 10.3390/children9070963 (PMC9324185; doi:10.3390/children9070963)
Supplement: Supplementary file 1 [file children-09-00963-s001.zip › children-1720431-Supplementary.pdf]

**Table S1.** Questions and scoring from the Uppsala Life and Health Young Cross-sectional Survey (LHS) selected by two independent researchers to represent DSM5 Conduct Disorder (CD) categories.

| LHS Question No. | LHS Question (Aggression: people or animals (APA))                                                                            | LHS Scoring                                                          |
|------------------|-------------------------------------------------------------------------------------------------------------------------------|----------------------------------------------------------------------|
| C5               | Have you exposed someone else to bullying, threats or harassment via mobile or SMS?                                           | 1=No, 2=One time, 3=Many times                                       |
| F16              | Have you beaten, kicked or exposed someone else to violence during the school term?                                           | 1=No, 2=One time, 3=Many times                                       |
| F18              | Have you been annoyed by someone else this semester?                                                                          | 1=No, 2=One time, 3=Many times                                       |
| G1-12            | Have you participated in fights at school?                                                                                    | 1=Never, 2=One time, 3=2-4 times, 4=5-10 times, 5=More than 10 times |
| G1-13            | Have you illegally carried a knife or other weapon in school?                                                                 | 1=Never, 2=One time, 3=2-4 times, 4=5-10 times, 5=More than 10 times |
| G1-14            | Have you illegally carried a knife or other weapon in the town?                                                               | 1=Never, 2=One time, 3=2-4 times, 4=5-10 times, 5=More than 10 times |
| G1-15            | Have you had sex with someone against their will?                                                                             | 1=Never, 2=One time, 3=2-4 times, 4=5-10 times, 5=More than 10 times |
| G1-16            | Have you failed to make a payment at the cinema, cafe, train or bus?                                                          | 1=Never, 2=One time, 3=2-4 times, 4=5-10 times, 5=More than 10 times |
| G1-17            | Have you threatened or forced someone to do something they didn't want to do?                                                 | 1=Never, 2=One time, 3=2-4 times, 4=5-10 times, 5=More than 10 times |
| G1-18            | Have you driven a moped, car or motorcycle while drinking alcohol?                                                            | 1=Never, 2=One time, 3=2-4 times, 4=5-10 times, 5=More than 10 times |
| G1-19            | Did you ever get stopped by the police for something you did?                                                                 | 1=Never, 2=One time, 3=2-4 times, 4=5-10 times, 5=More than 10 times |
|                  |                                                                                                                               | <b>Min Score: 11, Max Score: 49</b>                                  |
| LHS Question No. | LHS Question (Destruction of property (DP))                                                                                   | LHS Scoring                                                          |
| G1-10            | Have you deliberately destroyed or been involved in destroying things?                                                        | 1=Never, 2=One time, 3=2-4 times, 4=5-10 times, 5=More than 10 times |
| G1-11            | Have you been involved in scribbling, graffiti painting or writing something with a marker or spray paint without permission? | 1=Never, 2=One time, 3=2-4 times, 4=5-10 times, 5=More than 10 times |
|                  |                                                                                                                               | <b>Min Score: 2; Max Score: 10</b>                                   |
| LHS Question No. | LHS Question (Deceitfulness or theft (DT))                                                                                    | LHS Scoring                                                          |

|                  |                                                                                                   |                                                                                                           |
|------------------|---------------------------------------------------------------------------------------------------|-----------------------------------------------------------------------------------------------------------|
| G1-1             | Do you have or had gambling debts to others?                                                      | 1=Never, 2=One time, 3=2-4 times, 4=5-10 times, 5=More than 10 times                                      |
| G1-2             | Have you taken goods from a department store, kiosk or store without paying?                      | 1=Never, 2=One time, 3=2-4 times, 4=5-10 times, 5=More than 10 times                                      |
| G1-3             | Have you taken money at home that isn't yours?                                                    | 1=Never, 2=One time, 3=2-4 times, 4=5-10 times, 5=More than 10 times                                      |
| G1-4             | Have you stolen money or things from any schoolmate?                                              | 1=Never, 2=One time, 3=2-4 times, 4=5-10 times, 5=More than 10 times                                      |
| G1-5             | Have you threatened or forced someone to give you money, cell phone, cigarettes or anything else? | 1=Never, 2=One time, 3=2-4 times, 4=5-10 times, 5=More than 10 times                                      |
| G1-6             | Have you been involved in making a burglary?                                                      | 1=Never, 2=One time, 3=2-4 times, 4=5-10 times, 5=More than 10 times                                      |
| G1-7             | Have you stolen a bike?                                                                           | 1=Never, 2=One time, 3=2-4 times, 4=5-10 times, 5=More than 10 times                                      |
| G1-8             | Have you stolen a car?                                                                            | 1=Never, 2=One time, 3=2-4 times, 4=5-10 times, 5=More than 10 times                                      |
| G1-9             | Have you sold or bought something that you knew was stolen?                                       | 1=Never, 2=One time, 3=2-4 times, 4=5-10 times, 5=More than 10 times                                      |
| LHS Question No. | LHS Question (Serious violation of rules (SVR))                                                   | <b>Min Score: 9; Max Score: 45</b><br>LHS Scoring                                                         |
| A10-1            | How easy is it for you at home to say where you go?                                               | 1=Many times, 2=sometimes, 3=not so many times, 4=Never                                                   |
| A10-2            | How easy is it for you to work on your schoolwork at home?                                        | 1=Many times, 2=sometimes, 3=not so many times, 4=Never                                                   |
| A10-3            | How easy is it for you to go home?                                                                | 1=Many times, 2=sometimes, 3=not so many times, 4=Never                                                   |
| A10-4            | How easy is it for you to feel close to your home?                                                | 1=Many times, 2=sometimes, 3=not so many times, 4=Never                                                   |
| A10-5            | How easy is it for you to sleep at home?                                                          | 1=Many times, 2=sometimes, 3=not so many times, 4=Never                                                   |
| A10-6            | How easy is it for you help at home?                                                              | 1=Many times, 2=sometimes, 3=not so many times, 4=Never                                                   |
| A10-7            | How easy is it for you to be at home when you are not at school?                                  | 1=Many times, 2=sometimes, 3=not so many times, 4=Never                                                   |
| F12              | Are you truant from school?                                                                       | 1=No never, 2=yes, once in the term, 3=yes, once in the month, 4=yes, 2-3 times in the month, 5=yes, once |

|     |                                                                                            |                                                                                               |
|-----|--------------------------------------------------------------------------------------------|-----------------------------------------------------------------------------------------------|
|     |                                                                                            | a week, 6=yes, more than once a week                                                          |
| F13 | Have you not attended some of your subjects?                                               | 1=No, not in any subject, 2=Yes, 1-2 subjects, 3=Yes, 3-4 subjects, 4=Yes, 5 or more subjects |
| F14 | Have you felt uncomfortable because of fear of falling into trouble during the school day? | 1=No, 2=Yes one time, 3=yes, more than one time                                               |

**Min Score: 10; Max Score: 41**

**Total CD Min score:32; Max Score: 145**

(NB:High score denotes high level of self-reported behavioural issues); CD=Conduct Disorder; Min=Minimum; Max=Maximum; LHS=Life Health Survey Questionnaire

**Table S2.** Questions and scoring from the Uppsala Life and Health Young Cross-sectional Survey (LHS) selected by two independent researchers to represent DSM5 Conduct Disorder (CD) categories.

| LHS Question No. | LHS Question (Aggression: people or animals (APA)                                   | LHS Scoring                                                          |
|------------------|-------------------------------------------------------------------------------------|----------------------------------------------------------------------|
| C5               | Have you exposed someone else to bullying, threats or harassment via mobile or SMS? | 1=No, 2=One time, 3=Many times                                       |
| F16              | Have you beaten, kicked or exposed someone else to violence during the school term? | 1=No, 2=One time, 3=Many times                                       |
| F18              | Have you been annoyed by someone else this semester?                                | 1=No, 2=One time, 3=Many times                                       |
| G1-12            | Have you participated in fights at school?                                          | 1=Never, 2=One time, 3=2-4 times, 4=5-10 times, 5=More than 10 times |
| G1-13            | Have you illegally carried a knife or other weapon in school?                       | 1=Never, 2=One time, 3=2-4 times, 4=5-10 times, 5=More than 10 times |
| G1-14            | Have you illegally carried a knife or other weapon in the town?                     | 1=Never, 2=One time, 3=2-4 times, 4=5-10 times, 5=More than 10 times |
| G1-15            | Have you had sex with someone against their will?                                   | 1=Never, 2=One time, 3=2-4 times, 4=5-10 times, 5=More than 10 times |
| G1-16            | Have you failed to make a payment at the cinema, cafe, train or bus?                | 1=Never, 2=One time, 3=2-4 times, 4=5-10 times, 5=More than 10 times |
| G1-17            | Have you threatened or forced someone to do something they didn't want to do?       | 1=Never, 2=One time, 3=2-4 times, 4=5-10 times, 5=More than 10 times |
| G1-18            | Have you driven a moped, car or motorcycle while drinking alcohol?                  | 1=Never, 2=One time, 3=2-4 times, 4=5-10 times, 5=More than 10 times |
| G1-19            | Did you ever get stopped by the police for something you did?                       | 1=Never, 2=One time, 3=2-4 times, 4=5-10 times, 5=More than 10 times |
|                  |                                                                                     | <b>Min Score: 11, Max Score: 49</b>                                  |

| LHS Question No. | LHS Question (Destruction of property (DP))                                                                                   | LHS Scoring                                                                                                |
|------------------|-------------------------------------------------------------------------------------------------------------------------------|------------------------------------------------------------------------------------------------------------|
| G1-10            | Have you deliberately destroyed or been involved in destroying things?                                                        | 1=Never, 2=One time, 3=2-4 times, 4=5-10 times, 5=More than 10 times                                       |
| G1-11            | Have you been involved in scribbling, graffiti painting or writing something with a marker or spray paint without permission? | 1=Never, 2=One time, 3=2-4 times, 4=5-10 times, 5=More than 10 times<br><b>Min Score: 2; Max Score: 10</b> |
| LHS Question No. | LHS Question (Deceitfulness or theft (DT))                                                                                    | LHS Scoring                                                                                                |
| G1-1             | Do you have or had gambling debts to others?                                                                                  | 1=Never, 2=One time, 3=2-4 times, 4=5-10 times, 5=More than 10 times                                       |
| G1-2             | Have you taken goods from a department store, kiosk or store without paying?                                                  | 1=Never, 2=One time, 3=2-4 times, 4=5-10 times, 5=More than 10 times                                       |
| G1-3             | Have you taken money at home that isn't yours?                                                                                | 1=Never, 2=One time, 3=2-4 times, 4=5-10 times, 5=More than 10 times                                       |
| G1-4             | Have you stolen money or things from any schoolmate?                                                                          | 1=Never, 2=One time, 3=2-4 times, 4=5-10 times, 5=More than 10 times                                       |
| G1-5             | Have you threatened or forced someone to give you money, cell phone, cigarettes or anything else?                             | 1=Never, 2=One time, 3=2-4 times, 4=5-10 times, 5=More than 10 times                                       |
| G1-6             | Have you been involved in making a burglary?                                                                                  | 1=Never, 2=One time, 3=2-4 times, 4=5-10 times, 5=More than 10 times                                       |
| G1-7             | Have you stolen a bike?                                                                                                       | 1=Never, 2=One time, 3=2-4 times, 4=5-10 times, 5=More than 10 times                                       |
| G1-8             | Have you stolen a car?                                                                                                        | 1=Never, 2=One time, 3=2-4 times, 4=5-10 times, 5=More than 10 times                                       |
| G1-9             | Have you sold or bought something that you knew was stolen?                                                                   | 1=Never, 2=One time, 3=2-4 times, 4=5-10 times, 5=More than 10 times<br><b>Min Score: 9; Max Score: 45</b> |
| LHS Question No. | LHS Question (Serious violation of rules (SVR))                                                                               | LHS Scoring                                                                                                |
| A10-1            | How easy is it for you at home to say where you go?                                                                           | 1=Many times, 2=sometimes, 3=not so many times, 4=Never                                                    |
| A10-2            | How easy is it for you to work on your schoolwork at home?                                                                    | 1=Many times, 2=sometimes, 3=not so many times, 4=Never                                                    |

|       |                                                                                            |                                                                                                                                                |
|-------|--------------------------------------------------------------------------------------------|------------------------------------------------------------------------------------------------------------------------------------------------|
| A10-3 | How easy is it for you to go home?                                                         | 1=Many times, 2=sometimes, 3=not so many times, 4=Never                                                                                        |
| A10-4 | How easy is it for you to feel close to your home?                                         | 1=Many times, 2=sometimes, 3=not so many times, 4=Never                                                                                        |
| A10-5 | How easy is it for you to sleep at home?                                                   | 1=Many times, 2=sometimes, 3=not so many times, 4=Never                                                                                        |
| A10-6 | How easy is it for you help at home?                                                       | 1=Many times, 2=sometimes, 3=not so many times, 4=Never                                                                                        |
| A10-7 | How easy is it for you to be at home when you are not at school?                           | 1=Many times, 2=sometimes, 3=not so many times, 4=Never                                                                                        |
| F12   | Are you truant from school?                                                                | 1=No never, 2=yes, once in the term, 3=yes, once in the month, 4=yes, 2-3 times in the month, 5=yes, once a week, 6=yes, more than once a week |
| F13   | Have you not attended some of your subjects?                                               | 1=No, not in any subject, 2=Yes, 1-2 subjects, 3=Yes, 3-4 subjects, 4=Yes, 5 or more subjects                                                  |
| F14   | Have you felt uncomfortable because of fear of falling into trouble during the school day? | 1=No, 2=Yes one time, 3=yes, more than one time                                                                                                |

**Min Score: 10; Max Score: 41**

**Total CD Min score:32; Max Score: 145**

*(NB:High score denotes high level of self-reported behavioural issues); CD=Conduct Disorder; Min=Minimum; Max=Maximum; LHS=Life Health Survey Questionnaire*

**Table S3.** LHS scores categorised (by two independent researchers) according to DSM5 CD sub- categories, in terms of low, medium and high scores of self-reported PSC in younger, older and total male and female adolescents (in the total n=3,132 cohort, after exclusions).

|     |                  |                  | Low PSC          |                  |                  | Mean%.<br>[s.d.]<br>Medium PSC |                  |                  | High PSC         |                  |                  |                  |                  |                  |                  |                  |                  |                  |
|-----|------------------|------------------|------------------|------------------|------------------|--------------------------------|------------------|------------------|------------------|------------------|------------------|------------------|------------------|------------------|------------------|------------------|------------------|------------------|
|     |                  |                  | Male             |                  |                  | Female                         |                  |                  | Male             |                  |                  | Female           |                  |                  |                  |                  |                  |                  |
|     |                  |                  | e                |                  |                  | e                              |                  |                  |                  |                  |                  |                  |                  |                  |                  |                  |                  |                  |
|     | Young<br>(n=376) | Older<br>(n=344) | Total<br>(n=720) | Young<br>(n=210) | Older<br>(n=171] | Total<br>(n=381)               | Young<br>(n=212) | Older<br>(n=223) | Total<br>(n=435) | Young<br>(n=240) | Older<br>(n=238) | Total<br>(n=478) | Young<br>(n=137) | Older<br>(n=168) | Total<br>(n=305) | Young<br>(n=358) | Older<br>(n=455) | Total<br>(n=813) |
| APA | 30.29            | 29.79            | 30.05            | 28.16            | 28.49            | 28.31                          | 31.14            | 31.28            | 31.21            | 29.41            | 29.25            | 29.33            | 34.90            | 33.83            | 34.31            | 33.04            | 31.34            | 32.09            |
|     | [6.34]           | [4.76]           | [5.64]           | [2.30]           | [2.61]           | [2.45]                         | [5.85]]          | [5.06]           | [5.45]           | [3.28]           | [2.84]           | [3.07]           | [10.95]          | [7.79]           | [9.34]           | [7.43]           | [4.69]           | [6.11]           |
| DT  | 24.93            | 25.61            | 25.26            | 22.85            | 23.00            | 22.92                          | 25.95            | 26.54            | 26.25            | 23.99            | 23.73            | 23.86            | 28.40            | 28.53            | 28.47            | 26.98            | 26.15            | 26.51            |
|     | [10.25]          | [7.61]           | [9.083]          | [4.59]           | [4.45]           | [4.52]                         | [7.93]           | [8.50]           | [8.23]           | [5.14]           | [4.92]           | [5.03]           | [14.47]          | [11.78]          | [13.03]          | [8.69]           | [6.67]           | [7.63]           |

|              |              |              |              |              |              |              |              |              |              |              |              |              |              |              |              |              |              |              |
|--------------|--------------|--------------|--------------|--------------|--------------|--------------|--------------|--------------|--------------|--------------|--------------|--------------|--------------|--------------|--------------|--------------|--------------|--------------|
| DP           | <b>27.23</b> | <b>27.47</b> | <b>27.35</b> | <b>23.10</b> | <b>23.27</b> | <b>23.18</b> | <b>29.34</b> | <b>30.00</b> | <b>29.68</b> | <b>25.42</b> | <b>24.75</b> | <b>25.08</b> | <b>31.82</b> | <b>31.90</b> | <b>31.87</b> | <b>29.80</b> | <b>26.73</b> | <b>28.08</b> |
|              | [15.76]      | [14.62]      | [15.21]      | [9.41]       | [9.57]       | [9.47]       | [16.28]      | [16.28]      | [16.26]      | [11.85]      | [10.22]      | [11.06]      | [20.19]      | [19.36]      | [19.71]      | [16.42]      | [13.23]      | [14.79]      |
| SVR          | <b>42.29</b> | <b>44.98</b> | <b>43.58</b> | <b>38.27</b> | <b>42.66</b> | <b>40.24</b> | <b>42.96</b> | <b>48.44</b> | <b>45.77</b> | <b>39.91</b> | <b>43.72</b> | <b>41.81</b> | <b>46.10</b> | <b>50.01</b> | <b>48.26</b> | <b>44.92</b> | <b>47.50</b> | <b>46.37</b> |
|              | [7.72]       | [8.05]       | [7.99]       | [6.67]       | [7.69]       | [7.46]       | [7.84]       | [9.25]       | [9.01]       | [7.06]       | [8.30]       | [7.93]       | [10.35]      | [10.28]      | [10.48]      | [9.69]       | [9.34]       | [9.58]       |
| <b>Total</b> | <b>31.70</b> | <b>32.33</b> | <b>32.00</b> | <b>28.99</b> | <b>30.27</b> | <b>29.57</b> | <b>32.61</b> | <b>34.22</b> | <b>33.44</b> | <b>30.38</b> | <b>31.14</b> | <b>30.76</b> | <b>35.81</b> | <b>36.35</b> | <b>36.11</b> | <b>34.22</b> | <b>33.73</b> | <b>33.94</b> |
| <b>CD</b>    | [6.79]       | [5.28]       | [6.12]       | [3.13]       | [3.49]       | [3.35]       | [5.82]       | [5.60]       | [5.76]       | [3.77]       | [3.71]       | [3.75]       | [10.36]      | [8.23]       | [9.24]       | [7.26]       | [5.30]       | [6.24]       |

APA=Aggression to people or animals; DP=Destruction of property; DT=Deception or theft; SVR=Serious violation of rules; N=Number of participants per sub-sample – missing values excluded; s.d.=standard deviation; young=15-16yrs; older=17-19yrs; PSC=Psychosomatic Complaints; Low PSC=0-33 percentile, Medium PSC=34-66 percentile, High PSC=67-100 percentile
